# Supplementary material for: The Level of Urine Dipstick Proteinuria and Its Relation to the Risk of Incident Cholelithiasis
Source: PubMed Central journal article supplement (PMC7738639; doi:10.2188/jea.je20190223), 2021-01-05
Supplement: je-31-059-s001.pdf [file je-31-059-s001.pdf]

**eTable 1.** Hazard ratios for the incidence of cholelithiasis according to the three groups of urine protein level in gender subgroups (men and women)

|                            | HR (95% CI) <sup>a</sup> |                     |                  |                     |
|----------------------------|--------------------------|---------------------|------------------|---------------------|
|                            | Men (n=117,266)          |                     | Women (n=90,090) |                     |
|                            | Unadjusted               | Adjusted model      | Unadjusted       | Adjusted model      |
| <b>Urine protein level</b> |                          |                     |                  |                     |
| negative                   | 1.00 (reference)         | 1.00 (reference)    | 1.00 (reference) | 1.00 (reference)    |
| mild                       | 1.02 (0.76–1.45)         | 0.85 (0.59 –1.22)   | 1.26 (0.86–1.86) | 1.13 (0.76 –1.69)   |
| heavy                      | 1.65 (1.15–2.37)         | 1.31 (0.89–1.92)    | 1.95 (1.25–3.04) | 1.68 (1.06–2.65)    |
| P for trend                | 0.010                    | 0.175               | 0.003            | 0.018               |
| Age                        |                          | 1.05 (1.04–1.06)    |                  | 1.03 (1.02–1.04)    |
| BMI                        |                          | 1.067 (1.049–1.086) |                  | 1.045 (1.026–1.064) |
| Systolic BP                |                          | 0.993 (0.990–0.997) |                  | 0.997 (0.993–1.001) |
| Fasting blood glucose      |                          | 1.001 (0.999–1.003) |                  | 1.000 (0.997–1.002) |
| Total cholesterol          |                          | 0.998 (0.997–0.999) |                  | 0.999 (0.998–1.001) |
| GGT                        |                          | 1.002 (1.002–1.003) |                  | 1.004 (1.003–1.004) |

|                            |                     |                     |
|----------------------------|---------------------|---------------------|
| eGFR                       | 1.002 (0.999–1.004) | 1.000 (0.997–1.003) |
| Smoking amount, pack-years | 1.003 (1.000–1.006) | 1.014 (0.998–1.031) |
| Alcohol intake             | 1.084 (0.962–1.222) | 1.591 (0.996–2.541) |
| Physical activity          | 0.973 (0.860–1.101) | 0.988 (0.841–1.160) |

---

BMI, body mass index; BP, blood pressure; CI, confidence interval; eGFR, estimated glomerular filtration rate; GGT, gamma glutamyl transferase; HR, hazard ratio.

<sup>a</sup>Multivariate adjusted model was adjusted for age, BMI, systolic BP, fasting blood glucose, total cholesterol, GGT, eGFR, smoking amount (pack-years), alcohol intake, and physical activity.

Negative: urine dipstick proteinuria 0, mild: urine dipstick proteinuria 1+, heavy: urine dipstick proteinuria  $\geq 2+$

**eTable 2.** Hazard ratios for the incidence of cholelithiasis according to the three groups of urine protein level in age subgroups of  $\leq 55$ years and  $\geq 56$  years

|                            | HR (95% CI) <sup>a</sup>        |                     |                                 |                     |
|----------------------------|---------------------------------|---------------------|---------------------------------|---------------------|
|                            | Age $\leq 55$ years (n=101,428) |                     | Age $\geq 56$ years (n=105,928) |                     |
|                            | Unadjusted                      | Adjusted model      | Unadjusted                      | Adjusted model      |
| <b>Urine protein level</b> |                                 |                     |                                 |                     |
| negative                   | 1.00 (reference)                | 1.00 (reference)    | 1.00 (reference)                | 1.00 (reference)    |
| mild                       | 1.00 (0.61–1.64)                | 0.99 (0.61–1.63)    | 1.11 (0.82–1.50)                | 0.95 (0.69–1.30)    |
| heavy                      | 1.70 (1.00–2.87)                | 1.47 (0.85–2.55)    | 1.68 (1.21–2.34)                | 1.44 (1.01–2.03)    |
| P for trend                | 0.056                           | 0.142               | 0.003                           | 0.046               |
| Age                        |                                 | 1.06 (1.03–1.09)    |                                 | 1.04 (1.03–1.04)    |
| Gender (female vs. male)   |                                 | 1.09 (0.93–1.27)    |                                 | 0.88 (0.79–0.98)    |
| BMI                        |                                 | 1.070 (1.047–1.094) |                                 | 1.049 (1.033–1.065) |
| Systolic BP                |                                 | 0.991 (0.987–1.003) |                                 | 0.996 (0.993–0.999) |
| Fasting blood glucose      |                                 | 1.001 (0.998–1.003) |                                 | 1.001 (0.999–1.002) |

|                            |                     |                     |
|----------------------------|---------------------|---------------------|
| Total cholesterol          | 0.999 (0.997–1.001) | 0.998 (0.997–1.000) |
| GGT                        | 1.002 (1.001–1.003) | 1.003 (1.002–1.003) |
| eGFR                       | 1.002 (0.999–1.006) | 1.000 (0.997–1.003) |
| Smoking amount, pack-years | 1.005 (0.999–1.010) | 1.003 (1.000–1.006) |
| Alcohol intake             | 1.090 (0.903–1.316) | 1.153 (0.996–1.333) |
| Physical activity          | 1.072 (0.898–1.280) | 0.930 (0.827–1.047) |

---

BMI, body mass index; BP, blood pressure; CI, confidence interval; eGFR, estimated glomerular filtration rate; GGT, gamma glutamyl transferase; HR, hazard ratio.

<sup>a</sup>Multivariate adjusted model was adjusted for age, gender, BMI, systolic BP, fasting blood glucose, total cholesterol, GGT, eGFR, smoking amount (pack-years), alcohol intake, and physical activity.

Negative: urine dipstick proteinuria 0, mild: urine dipstick proteinuria 1+, heavy: urine dipstick proteinuria  $\geq 2+$
